# Supplementary material for: Rapid isolation and diagnosis of live bacteria from human joint fluids by using an integrated microfluidic system
Source: Royal Society of Chemistry journal article supplement (doi:10.1039/c4lc00471j), 2014-01-01
Supplement: c4lc00471j2.pdf [file c4lc00471j2.pdf]

## Supplemental information

### Rapid isolation and diagnosis of live bacteria from human joint fluids by using an integrated microfluidic system

Wen-Hsin Chang<sup>a</sup>, Chih-Hung Wang<sup>a</sup>, Sung-Yi Yang<sup>d</sup>, Yi-Cheng Lin<sup>d</sup>, Jiunn-Jong Wu<sup>e</sup>, Mel S. Lee<sup>f†</sup> and Gwo-Bin Lee<sup>a,b,c\*</sup>

<sup>a</sup>Department of Power Mechanical Engineering, <sup>b</sup>Institute of Biomedical Engineering, <sup>c</sup>Institute of NanoEngineering and Microsystems, National Tsing Hua University, Hsinchu, Taiwan, <sup>d</sup>Medical R&D, Jabil Circuit Inc., Ltd., Taichung, Taiwan, <sup>e</sup>Department of Medical Laboratory Science and Biotechnology, National Cheng Kung University, Tainan, Taiwan, <sup>f</sup>Department of Orthopaedic Surgery, Chia-Yi Chang Gung Memorial Hospital, Taiwan

Co-corresponding authors: \*Dr. Gwo-Bin Lee; Department of Power Mechanical Engineering, National Tsing Hua University, Hsinchu 30013, Taiwan; Fax: +886-3-5742495; Tel: +886-3-5715131 Ext. 33765; e-mail: gwobin@pme.nthu.edu.tw; +Dr. Shuann-Sheng Lee; Department of Orthopaedic Surgery, Chia-Yi Chang Gung Memorial Hospital, Chia-Yi 61363, Taiwan; Tel: +886-975-365-587; e-mail: mellee@adm.cgmh.org.tw

- I. Automatic transportation of liquid.** Automatic liquid transportation, mixing, and suction performed on the microfluidic chip are shown in Video 1. At first, red ink was transported from the reagent chambers to the reaction chambers. Then, blue ink was transported from the wash buffer chambers to the reaction chambers. Subsequent mixing causes the ink in the reaction chambers to turn into purple. After mixing, the ink in the reaction chambers was sucked out from the reaction chambers.
- II. Positive control cloning.** The PCR products amplified by the 16S rRNA primer set from *Escherichia coli* were cloned into pCR®2.1-TOPO® TA vector by the method described in the product manual (TOPO TA Cloning®, Invitrogen Corp., USA). The cloned plasmids were then used as the target in subsequent PCR reactions using the 16S rRNA primer set. The PCR products using the cloned plasmids are shown in Figure S1. Furthermore, the cloned plasmid was further confirmed by DNA sequencing.

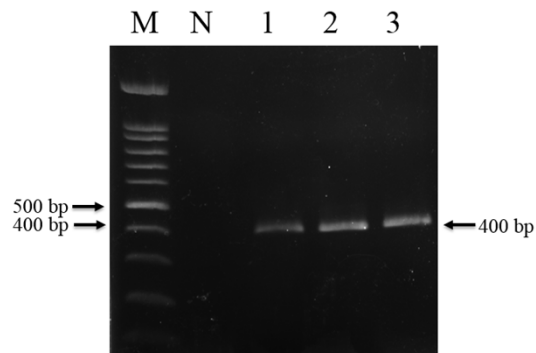

**Figure S1.** Confirmation of the plasmids containing the 16S rRNA-specific fragment by PCR. M: 100-bp ladders, N: PCR products of the negative control using double-distilled water, lane 1: PCR products of the cloned plasmid 1, lane 2 : PCR products of the cloned plasmid 2, 3: PCR products of the cloned plasmid 3.
